# Supplementary material for: Structural resemblance of the DNAJA-family protein, Tid1, to the DNAJB-family Hsp40
Source: PubMed Central journal article supplement — BMB Rep. 2022 Oct 31;55(10):488–93. doi: 10.5483/BMBRep.2022.55.10.051 (PMC9623239; doi:10.5483/bmbrep.2022.55.10.051), 2022-10-31
Supplement: bmb-55-10-488-supple.pdf [file bmb-55-10-488-supple.pdf]

## Supplementary Data

### Structural resemblance of the DNAJA-family protein, Tid1, to the DNAJB-family Hsp40

Jinhwa Jang<sup>1,#</sup>, Sung-Hee Lee<sup>1,#</sup>, Dong-Hoon Kang<sup>1</sup>, Dae-Won Sim<sup>2</sup>, Kyung-Suk Ryu<sup>3</sup>, Ku-Sung Jo<sup>2</sup>, Jinhyuk Lee<sup>4,5</sup>, Hyojung Ryu<sup>6,7</sup>, Eun-Hee Kim<sup>3</sup>, Hyung-Sik Won<sup>2,8,\*</sup> & Ji-Hun Kim<sup>1,\*</sup>

<sup>1</sup>College of Pharmacy, Chungbuk National University, Cheongju 28160, <sup>2</sup>Department of Biotechnology, Research Institute (RIBHS) and College of Biomedical and Health Science, Konkuk University, Chungju 27478, <sup>3</sup>Research Center for Bioconvergence Analysis, Korea Basic Science Institute, Cheongju 28119, <sup>4</sup>Genome Editing Research Center, Korea Research Institute of Bioscience and Biotechnology (KRIBB), Daejeon 34141, <sup>5</sup>Department of Bioinformatics, KRIBB School of Bioscience, University of Science and Technology (UST), Daejeon 34113, <sup>6</sup>Korean Genomics Center (KOGIC), Ulsan National Institute of Science and Technology (UNIST), Ulsan 44919, <sup>7</sup>Department of Biomedical Engineering, College of Information and Biotechnology, UNIST, Ulsan 44919, <sup>8</sup>BK21 Project Team, Department of Applied Life Science, Graduate School, Konkuk University, Chungju 27478, Korea

\*Corresponding authors. Ji-Hun Kim, Tel: +82-43-249-1343; Fax: +82-43-268-2732; E-mail: nmrjhkim@cbnu.ac.kr; Hyung-Sik Won, Tel: +82-43-840-3589; Fax: +82-43-840-3048; E-mail: wonhs@kku.ac.kr

**Table 1. Structural statistics for the 20 energy-minimized conformers of Tid1-JD**

---

|                                                                              |                 |
|------------------------------------------------------------------------------|-----------------|
| Experimental constraints                                                     |                 |
| NOE constraint total                                                         | 1365            |
| Intra-residue                                                                | 431             |
| Sequential                                                                   | 331             |
| Medium-range                                                                 | 381             |
| Long-range                                                                   | 222             |
| Dihedral constraints                                                         |                 |
| $\phi$                                                                       | 62              |
| $\psi$                                                                       | 62              |
| RMSD to the mean structure (Å) for residues 94-99, 105-118, 131-145, 149-157 |                 |
| Backbone atoms (N, C, CO)                                                    | 0.39 +/- 0.08   |
| All heavy atoms                                                              | 0.97 +/- 0.10   |
| Violations (mean and s.d.)                                                   |                 |
| Distance constraints (Å)                                                     | 0.079 +/- 0.003 |
| Dihedral angle constraints (°)                                               | 3.240 +/- 0.762 |
| Max. dihedral angle violation (°)                                            | 156.941         |
| Max. distance constraint violation (Å)                                       | 0.08            |
| Deviations from idealized geometry (RMS Z-score)                             |                 |
| Bond lengths (Å)                                                             | 0.820           |
| Bond angles (°)                                                              | 0.939           |
| Improper (°)                                                                 | 0.621           |
| Ramachandran statistics                                                      |                 |
| MolProbity                                                                   |                 |
| Favored                                                                      | 97.46           |

---

---

|                     |           |
|---------------------|-----------|
| Allowed             | 2.54      |
| outlier             | 0         |
| Scores <sup>a</sup> |           |
| DOPE                | -6730.983 |
| nDOPE               | -1.814    |
| dDFIRE              | -151.937  |

---

<sup>a</sup>The optimal energy properties (DOPE, normalized DOPE (nDOPE), and dDFIRE) were calculated by CHARMM program
